# Supplementary material
Source: PubMed Central journal article supplement (PMC5476457)
Supplement: NIHMS863584-supplement-Supplement.pdf [file NIHMS863584-supplement-Supplement.pdf]

## Supplementary Online Content

Greenberg JH, Zappitelli M, Devarajan P, et al; TRIBE-AKI Consortium. Kidney outcomes 5 years after pediatric cardiac surgery: the TRIBE-AKI study. *JAMA Pediatr*. Published online September 12, 2016. doi:10.1001/jamapediatrics.2016.1532.

**eMethods.** Analyte Measurements

**eTable 1.** Baseline Characteristics between those with and without follow-up visits

**eTable 2.** Baseline and post-operative characteristics of study cohort by five-year chronic kidney disease (CKD) status

**eTable 3.** Baseline and post-operative characteristics of study cohort by severe AKI status

**eTable 4.** Five-year outcomes by severe acute kidney injury (AKI) status

**eTable 5.** Pediatric studies of hypertension prevalence

**eTable 6.** Peri-operative biomarker results and 5-year hypertension

**eTable 7.** Peri-operative biomarker results and 5-year CKD

**eTable 8.** Association of kidney injury and 5 year renal outcomes

This supplementary material has been provided by the authors to give readers additional information about their work.

**Greenberg JH, Zappitelli M, Devarajan P, Thiessen-Philbrook HR, Krawczeski C, Li S, Garg AX, Coca S, Parikh CR, for the TRIBE-AKI Consortium. Kidney Outcomes Five Years after Pediatric Cardiac Surgery.**

**On-line Only Supplemental Material**

**eMethods: Analyte Measurements**

**eTable 1: Baseline Characteristics between those with and without follow-up visits**

**eTable 2: Baseline and post-operative characteristics of study cohort by five-year chronic kidney disease (CKD) status**

**eTable 3: Baseline and post-operative characteristics of study cohort by severe AKI status**

**eTable 4. Five-year outcomes by severe acute kidney injury (AKI) status**

**eTable 5: Pediatric studies of hypertension prevalence**

**eTable 6: Peri-operative biomarker results and 5-year hypertension**

**eTable 7: Peri-operative biomarker results and 5-year CKD**

**eTable 8: Association of kidney injury and 5 year renal outcomes**

## eMethods

**Analyte Measurements:** Blood and urine were centrifuged and stored at each site as 0.2ml (plasma) and 1.0ml (urine) aliquots in a -80°C freezer, within six hours from collection. Cincinnati Children's Hospital and Montreal Children's Hospital made monthly shipments of biospecimens on dry ice to Yale University. All shipped biospecimens were stored at Yale University in a -80°C freezer until laboratory measurements were performed. Serum creatinine and urine creatinine were measured by IDMS-traceable assay and urine albumin was measured by immunoturbidimetry at the Yale-New Haven Hospital Clinical Laboratory. (Roche Diagnostics P800 chemistry analyzer). Serum cystatin C was measured by turbidimetric assay using a Roche COBAS 6000 chemistry analyzer at the University of Minnesota. Samples were analyzed according to the manufacturer's specifications and individuals performing measurements were blind to clinical outcomes. Serum creatinine and cystatin C measurements were repeated in 30% of baseline specimens to exclude assay drift. Urine dipstick was also performed on the same day of the visit using a Clinitek Status urinalyzer (Siemens, Munich, Germany). Urine biomarkers were measured as previously described.<sup>14,15</sup> Briefly, urine neutrophil gelatinase-associated lipocalin (NGAL) and interleukin 18 (IL-18) were measured using an assay (ARCHITECT; Abbott Diagnostics) with coefficients of variation of 5% and 8%, respectively. Kidney injury molecule 1 (KIM-1) and liver fatty acid-binding protein (L-FABP) were measured in multiplex format (Multi-Assay; MesoScale Discovery). The intraassay coefficient of variation is 10% or less for both KIM-1 and L-FABP assays.

**eTable 1: Baseline Characteristics between those with and without follow-up visits**

|                                                                                                                                                                                                                                                                                                                                                                                                                                                           | Follow-up completed<br>(n=131) | Follow-up not completed<br>(n=180) | P value |
|-----------------------------------------------------------------------------------------------------------------------------------------------------------------------------------------------------------------------------------------------------------------------------------------------------------------------------------------------------------------------------------------------------------------------------------------------------------|--------------------------------|------------------------------------|---------|
| Age (months) (median [IQR])                                                                                                                                                                                                                                                                                                                                                                                                                               | 31.9 [6.0, 58.6]               | 13.2 [4.7, 67.4]                   | 0.52    |
| sex M                                                                                                                                                                                                                                                                                                                                                                                                                                                     | 68 (52%)                       | 103 (57%)                          | 0.35    |
| RACHS-1 Score                                                                                                                                                                                                                                                                                                                                                                                                                                             |                                |                                    |         |
| 1                                                                                                                                                                                                                                                                                                                                                                                                                                                         | 7 (5%)                         | 11 (6%)                            | 0.98    |
| 2                                                                                                                                                                                                                                                                                                                                                                                                                                                         | 66 (51%)                       | 87 (49%)                           |         |
| 3                                                                                                                                                                                                                                                                                                                                                                                                                                                         | 52 (40%)                       | 74 (41%)                           |         |
| 4                                                                                                                                                                                                                                                                                                                                                                                                                                                         | 5 (4%)                         | 7 (4%)                             |         |
| CPB Time                                                                                                                                                                                                                                                                                                                                                                                                                                                  | 92 [65, 125]                   | 101 [66, 139]                      | 0.28    |
| Cross Clamp Time                                                                                                                                                                                                                                                                                                                                                                                                                                          | 38 [0, 64]                     | 42 [0, 72]                         | 0.38    |
| AKIN AKI Stages                                                                                                                                                                                                                                                                                                                                                                                                                                           |                                |                                    |         |
| No AKI                                                                                                                                                                                                                                                                                                                                                                                                                                                    | 74 (56%)                       | 106 (59%)                          | 0.44    |
| Stage 1                                                                                                                                                                                                                                                                                                                                                                                                                                                   | 46 (35%)                       | 53 (29%)                           |         |
| Stage 2                                                                                                                                                                                                                                                                                                                                                                                                                                                   | 7 (5%)                         | 17 (9%)                            |         |
| Stage 3                                                                                                                                                                                                                                                                                                                                                                                                                                                   | 4 (3%)                         | 4 (2%)                             |         |
| Dialysis                                                                                                                                                                                                                                                                                                                                                                                                                                                  | 3 (2%)                         | 2 (1%)                             | 0.41    |
| In hospital Death                                                                                                                                                                                                                                                                                                                                                                                                                                         | 0 (0%)                         | 6 (3%)                             | 0.03    |
| Abbreviations: <b>IQR</b> , interquartile range; <b>RACHS</b> , risk adjustment for congenital heart surgery; <b>CPB</b> , cardiopulmonary bypass; <b>AKIN</b> , Acute Kidney Injury Network; <b>AKI</b> , Acute Kidney Injury; <b>N/A</b> , not available. Results reported as n(%) or median (25 <sup>th</sup> percentile, 75 <sup>th</sup> percentile). Results reported as n(%) or median (25 <sup>th</sup> percentile, 75 <sup>th</sup> percentile). |                                |                                    |         |

**eTable 2: Baseline and post-operative characteristics of study cohort by 5-year chronic kidney disease (CKD) status**

|                                                                                                                                                                                                                                                                                                                                                                                                                                                                                                                                                                                                                                                                 | Overall (n=116)    | CKD (n=21)        | No CKD (n=95)      | P-value |
|-----------------------------------------------------------------------------------------------------------------------------------------------------------------------------------------------------------------------------------------------------------------------------------------------------------------------------------------------------------------------------------------------------------------------------------------------------------------------------------------------------------------------------------------------------------------------------------------------------------------------------------------------------------------|--------------------|-------------------|--------------------|---------|
| <b>Pre-operative/baseline</b>                                                                                                                                                                                                                                                                                                                                                                                                                                                                                                                                                                                                                                   |                    |                   |                    |         |
| Age (months), (median (IQR))                                                                                                                                                                                                                                                                                                                                                                                                                                                                                                                                                                                                                                    | 6.1 (36.1, 58.9)   | 37.4 (6, 68.9)    | 35.76 (6.1, 58.6)  | 0.75    |
| Male gender                                                                                                                                                                                                                                                                                                                                                                                                                                                                                                                                                                                                                                                     | 62 (53%)           | 12 (57%)          | 50 (53%)           | 0.71    |
| Non-white                                                                                                                                                                                                                                                                                                                                                                                                                                                                                                                                                                                                                                                       | 15 (13%)           | 4 (19%)           | 11 (12%)           | 0.36    |
| ACE inhibitor                                                                                                                                                                                                                                                                                                                                                                                                                                                                                                                                                                                                                                                   | 22 (19%)           | 5 (24%)           | 17 (18%)           | 0.53    |
| Loop diuretics                                                                                                                                                                                                                                                                                                                                                                                                                                                                                                                                                                                                                                                  | 28 (24%)           | 5 (24%)           | 23 (24%)           | 0.97    |
| Potassium sparing diuretics                                                                                                                                                                                                                                                                                                                                                                                                                                                                                                                                                                                                                                     | 10 (9%)            | 1 (5%)            | 9 (9%)             | 0.49    |
| Aspirin                                                                                                                                                                                                                                                                                                                                                                                                                                                                                                                                                                                                                                                         | 14 (12%)           | 5 (24%)           | 9 (9%)             | 0.07    |
| Pre-operative estimated SCr-GFR (median (IQR))                                                                                                                                                                                                                                                                                                                                                                                                                                                                                                                                                                                                                  | 79.2 (92.9, 112.5) | 82.6 (72.3, 88.5) | 95.5 (82.6, 115.2) | 0.02    |
| Pre-operative CKD‡                                                                                                                                                                                                                                                                                                                                                                                                                                                                                                                                                                                                                                              | 43 (37%)           | 13 (62%)          | 30 (32%)           | 0.01    |
| RACHS-1 surgical category 1                                                                                                                                                                                                                                                                                                                                                                                                                                                                                                                                                                                                                                     | 7 (6%)             | 2 (10%)           | 5 (5%)             | 0.89    |
| RACHS-1 surgical category 2                                                                                                                                                                                                                                                                                                                                                                                                                                                                                                                                                                                                                                     | 54 (47%)           | 10 (48%)          | 44 (47%)           | 0.89    |
| RACHS-1 surgical category 3                                                                                                                                                                                                                                                                                                                                                                                                                                                                                                                                                                                                                                     | 49 (43%)           | 8 (38%)           | 41 (44%)           | 0.89    |
| RACHS-1 surgical category 4                                                                                                                                                                                                                                                                                                                                                                                                                                                                                                                                                                                                                                     | 5 (4%)             | 1 (5%)            | 4 (4%)             | 0.89    |
| <b>Type of Surgery</b>                                                                                                                                                                                                                                                                                                                                                                                                                                                                                                                                                                                                                                          |                    |                   |                    |         |
| Septal Defect Repair                                                                                                                                                                                                                                                                                                                                                                                                                                                                                                                                                                                                                                            | 39 (36%)           | 9 (45%)           | 30 (34%)           | 0.60    |
| Inflow/Outflow tract or valve procedure                                                                                                                                                                                                                                                                                                                                                                                                                                                                                                                                                                                                                         | 33 (30%)           | 4 (20%)           | 18 (20%)           |         |
| Combined Procedure                                                                                                                                                                                                                                                                                                                                                                                                                                                                                                                                                                                                                                              | 48 (44%)           | 7 (35%)           | 41 (46%)           |         |
| <b>Hospital outcomes</b>                                                                                                                                                                                                                                                                                                                                                                                                                                                                                                                                                                                                                                        |                    |                   |                    |         |
| Peak post-op SCr rise from baseline (median (IQR))                                                                                                                                                                                                                                                                                                                                                                                                                                                                                                                                                                                                              | 0.18 (0.33, 0.67)  | 0.25 (0, 0.33)    | 0.5 (0.2, 0.67)    | 0.02    |
| Renal replacement                                                                                                                                                                                                                                                                                                                                                                                                                                                                                                                                                                                                                                               | 3 (3%)             | 0                 | 3 (3%)             | 0.41    |
| ICU length of stay (median (IQR))                                                                                                                                                                                                                                                                                                                                                                                                                                                                                                                                                                                                                               | 1 (2, 4)           | 3 (1, 4)          | 2 (1, 3)           | 0.30    |
| Hospital length of stay (median (IQR))                                                                                                                                                                                                                                                                                                                                                                                                                                                                                                                                                                                                                          | 4 (5, 7.5)         | 6 (4, 10)         | 5 (4, 7)           | 0.28    |
| Abbreviations: <b>IQR</b> , interquartile range, <b>SCr</b> , serum creatinine (in mg/dl. 1mg/dl = 88.4 μmole/L), <b>GFR</b> , glomerular filtration rate (ml/min/1.73m <sup>2</sup> ), ‡Pre-op CKD defined as eGFR < age-based thresholds or microalbuminuria < age-based thresholds: defined as age-based GFR thresholds: <90 ml/min/1.73m <sup>2</sup> for ≥2 years; <76 for 1.5-2 years; <74 for 1-1.5 years, <65 for <1 year, <58 for 3months-8 months. Pre-op microalbuminuria defined by age-based albumin to creatinine ratio thresholds: >30mg/g for ≥2 years, >75 for 6months-2 years. <b>RACHS-1</b> , risk adjustment for congenital heart surgery. |                    |                   |                    |         |

**eTable 3: Baseline and post-operative characteristics of study cohort by severe AKI status**

| Characteristic                                                                                                                                                                                                                                                                               | Overall (n=131)       | Severe AKI (n=21)     | No Severe AKI (n=110) | P value |
|----------------------------------------------------------------------------------------------------------------------------------------------------------------------------------------------------------------------------------------------------------------------------------------------|-----------------------|-----------------------|-----------------------|---------|
| <b>Pre-operative/baseline</b>                                                                                                                                                                                                                                                                |                       |                       |                       |         |
| Age (months), (median (IQR))                                                                                                                                                                                                                                                                 | 6 (31.92, 58.56)      | 11.4 (6.36, 46.44)    | 35.58 (6, 59.16)      | 0.37    |
| Male gender                                                                                                                                                                                                                                                                                  | 68 (52%)              | 12 (57%)              | 56 (51%)              | 0.60    |
| Non-white                                                                                                                                                                                                                                                                                    | 20 (15%)              | 3 (14%)               | 17 (15%)              | 0.89    |
| ACE inhibitor                                                                                                                                                                                                                                                                                | 26 (20%)              | 5 (24%)               | 21 (19%)              | 0.62    |
| Loop diuretic                                                                                                                                                                                                                                                                                | 34 (26%)              | 8 (38%)               | 26 (24%)              | 0.17    |
| Potassium Sparing diuretic                                                                                                                                                                                                                                                                   | 14 (11%)              | 4 (19%)               | 10 (9%)               | 0.18    |
| ASA                                                                                                                                                                                                                                                                                          | 15 (11%)              | 2 (10%)               | 13 (12%)              | 0.76    |
| Pre-operative estimated SCr-GFR (median (IQR))                                                                                                                                                                                                                                               | 78.47 (92.72, 110.13) | 97.06 (87.42, 125.97) | 90.86 (78.47, 107.38) | 0.08    |
| Pre-operative SCr-GFR percentile (mean +/- std dev)                                                                                                                                                                                                                                          | 59.27 (33.24)         | 73.29 (30.12)         | 56.6 (33.26)          | 0.03    |
| RACHS-1 surgical category 1                                                                                                                                                                                                                                                                  | 7 (5%)                | 0                     | 7 (6%)                | 0.03    |
| RACHS-1 surgical category 2                                                                                                                                                                                                                                                                  | 66 (51%)              | 9 (43%)               | 57 (52%)              | 0       |
| RACHS-1 surgical category 3                                                                                                                                                                                                                                                                  | 52 (40%)              | 9 (43%)               | 43 (39%)              | 0       |
| RACHS-1 surgical category 4                                                                                                                                                                                                                                                                  | 5 (4%)                | 3 (14%)               | 2 (2%)                | 0       |
| <b>Hospital renal outcomes</b>                                                                                                                                                                                                                                                               |                       |                       |                       |         |
| Peak post-op SCr rise from baseline (median (Q1,Q3))                                                                                                                                                                                                                                         | 0.2 (0.33, 0.67)      | 1.25 (1, 1.5)         | 0.33 (0, 0.5)         | <.01    |
| CRRT                                                                                                                                                                                                                                                                                         | 1 (33%)               | 1 (33%)               | 0                     | 0.07    |
| Peritoneal dialysis                                                                                                                                                                                                                                                                          | 2 (67%)               | 2 (67%)               | 0                     | 0       |
| Abbreviations: AKI, Acute Kidney Injury, IQR, interquartile range, SCr, serum creatinine (in mg/dl. 1mg/dl = 88.4 µmole/L), GFR, glomerular filtration rate ( ml/min/1.73m <sup>2</sup> ), RACHS-1, risk adjustment for congenital heart surgery, CRRT, continuous renal replacement therapy |                       |                       |                       |         |

**eTable 4. Five-year outcomes by severe acute kidney injury (AKI) status**

| Characteristics                                                                                                                                                                                                                                                                                                                                                                                       | Overall (n=131)         | Severe AKI (n=21)       | Non-AKI (n=110)        | P-value |
|-------------------------------------------------------------------------------------------------------------------------------------------------------------------------------------------------------------------------------------------------------------------------------------------------------------------------------------------------------------------------------------------------------|-------------------------|-------------------------|------------------------|---------|
| <b>Visit examination</b>                                                                                                                                                                                                                                                                                                                                                                              |                         |                         |                        |         |
| Height z-score (median [IQR])                                                                                                                                                                                                                                                                                                                                                                         | -0.56 [-1.6, 0.5]       | -0.8 [-1.53, 0.29]      | -0.51 [-1.61, 0.56]    | 0.58    |
| Weight z-score                                                                                                                                                                                                                                                                                                                                                                                        | -0.14 [-1.01, 0.61]     | -0.76 [-1.68, 0.47]     | -0.1 [-0.82, 0.65]     | 0.08    |
| BMI z-score                                                                                                                                                                                                                                                                                                                                                                                           | 0.36 [-0.45, 1.05]      | -0.26 [-1.24, 0.52]     | 0.39 [-0.25, 1.07]     | 0.05    |
| <b>Blood pressure</b>                                                                                                                                                                                                                                                                                                                                                                                 |                         |                         |                        |         |
| Systolic BP z-score                                                                                                                                                                                                                                                                                                                                                                                   | 0.41 [-0.21, 1.03]      | 0.56 [0.12, 1.02]       | 0.33 [-0.22, 1.09]     | 0.64    |
| Diastolic BP z-score                                                                                                                                                                                                                                                                                                                                                                                  | -0.01 [-0.27, 0.35]     | 0.02 [-0.16, 0.31]      | -0.02 [-0.31, 0.38]    | 0.79    |
| Systolic Pre-HTN                                                                                                                                                                                                                                                                                                                                                                                      | 12 (9%)                 | 1 (5%)                  | 11 (10%)               | 0.43    |
| Systolic HTN                                                                                                                                                                                                                                                                                                                                                                                          | 14 (11%)                | 1 (5%)                  | 13 (12%)               | 0.43    |
| Diastolic Pre-HTN                                                                                                                                                                                                                                                                                                                                                                                     | 8 (6%)                  | 0                       | 8 (7%)                 | 0.30    |
| Diastolic HTN                                                                                                                                                                                                                                                                                                                                                                                         | 4 (3%)                  | 0                       | 4 (4%)                 | 0.30    |
| Pre-HTN                                                                                                                                                                                                                                                                                                                                                                                               | 6 (5%)                  | 1 (5%)                  | 5 (5%)                 | 0.11    |
| HTN (BP or self-report)                                                                                                                                                                                                                                                                                                                                                                               | 22 (17%)                | 1 (5%)                  | 21 (19%)               | 0.11    |
| <b>Proteinuria</b>                                                                                                                                                                                                                                                                                                                                                                                    |                         |                         |                        |         |
| Negative                                                                                                                                                                                                                                                                                                                                                                                              | 109 (90%)               | 20 (100%)               | 89 (88%)               | 0.27    |
| Trace                                                                                                                                                                                                                                                                                                                                                                                                 | 5 (4%)                  | 0                       | 5 (5%)                 | 0.27    |
| Small                                                                                                                                                                                                                                                                                                                                                                                                 | 7 (6%)                  | 0                       | 7 (7%)                 | 0.27    |
| Large                                                                                                                                                                                                                                                                                                                                                                                                 | 0                       | 0                       | 0                      | 0.27    |
| Albumin to creatinine ratio (mg/g), (median [IQR]),                                                                                                                                                                                                                                                                                                                                                   | 5.1 [2.39, 12.13]       | 4.74 [2.3, 9.21]        | 5.45 [2.76, 12.83]     | 0.49    |
| Microalbuminuria (Alb Cre > 30 mg/g)                                                                                                                                                                                                                                                                                                                                                                  | 9 (8%)                  | 1 (6%)                  | 8 (8%)                 | 0.70    |
| <b>Renal function (GFR)</b>                                                                                                                                                                                                                                                                                                                                                                           |                         |                         |                        |         |
| SCr-eGFR (median [IQR])                                                                                                                                                                                                                                                                                                                                                                               | 101.22 [111.66, 125.53] | 125.28 [105.05, 134.06] | 110.89 [99.02, 123.53] | 0.10    |
| SCr-eGFR abnormal for age (<90)                                                                                                                                                                                                                                                                                                                                                                       | 13 (13%)                | 0                       | 13 (15%)               | 0.14    |
| SCr-eGFR < 60                                                                                                                                                                                                                                                                                                                                                                                         | 1 (1%)                  | 0                       | 1 (1%)                 | 0.70    |
| CKD (SCr-eGFR <90 or microalbuminuria)                                                                                                                                                                                                                                                                                                                                                                | 21 (18%)                | 1 (6%)                  | 20 (20%)               | 0.13    |
| Nephrologist F/U                                                                                                                                                                                                                                                                                                                                                                                      | 5 (4%)                  | 1 (5%)                  | 4 (4%)                 | 0.81    |
| Family history of renal disease                                                                                                                                                                                                                                                                                                                                                                       | 61 (47%)                | 10 (48%)                | 51 (46%)               | 0.91    |
| At least 1 hospital/ER readmission                                                                                                                                                                                                                                                                                                                                                                    | 32 (24%)                | 7 (33%)                 | 25 (23%)               | 0.30    |
| Abbreviations: <b>IQR</b> , interquartile range, <b>BMI</b> , body mass index, <b>HTN</b> , hypertension, <b>GFR</b> , glomerular filtration rate (ml/min/1.73m <sup>2</sup> ), <b>SCr</b> , serum creatinine (in mg/dl. 1mg/dl = 88.4 μmole/L), <b>CKD</b> , chronic kidney disease, <b>AKI</b> , Acute Kidney Injury <b>F/U</b> , follow-up, <b>ER</b> , emergency room, <b>N/A</b> , not available |                         |                         |                        |         |

**eTable 5: Pediatric studies of hypertension prevalence**

| <b>Author, Year published</b> | <b>Population</b>                                | <b>BP definition</b>               | <b>Ascertainment of BP</b>                     | <b>Years</b> | <b>Age range (years)</b> |
|-------------------------------|--------------------------------------------------|------------------------------------|------------------------------------------------|--------------|--------------------------|
| Hansen et al., 2007           | Northeast Ohio, USA                              | Sys or Dias $\geq 95\%$ X 3 visits | Automatic BP cuff and confirmed with manual BP | 1999-2006    | 3-18                     |
| Lo et al., 2013               | Kaiser (California, Colorado, Minnesota), USA    | Sys or Dias $\geq 95\%$ X 3 visits | Automatic or manual BP cuff                    | 2007-2009    | 3-17                     |
| Xi et al., 2016               | National Health and Nutrition Examination Survey | Sys or Dias $\geq 95\%$ X 3 visits | Automatic or manual BP cuff                    | 2009-2012    | 8-17                     |

Abbreviations: **BP**, blood pressure, %, percentile, **Sys**, systolic, **Dias**, Diastolic, **N/A**, not available



**eTable 6: Peri-operative biomarker results and 5-year hypertension**

| Biomarker                         |                 | Overall                                       | Hypertension                                 | No Hypertension                               | P-value |
|-----------------------------------|-----------------|-----------------------------------------------|----------------------------------------------|-----------------------------------------------|---------|
| Urine albumin                     | Pre-op          | 27.64 (45.1) [4.1, 9.4, 29.8] N=117           | 17.32 (29.57) [2.8, 6.2, 17.8] N=19          | 29.64 (47.38) [4.2, 11.2, 35] N=98            | 0.11    |
|                                   | Day 1 0-6 Hours | 71.68 (107.7) [11.7, 30.9, 93.6] N=129        | 49.11 (63.17) [12, 16.8, 81.4] N=21          | 76.07 (114.06) [11.3, 32.05, 96.85] N=108     | 0.40    |
| Urine Albumin to Creatinine Ratio | Pre-op          | 80.24 (210.2) [10.95, 23.64, 75.45] N=117     | 131.59 (476.51) [10.01, 22.43, 33.46] N=19   | 70.29 (100.43) [10.96, 26.62, 88.49] N=98     | 0.18    |
|                                   | Day 1 0-6 Hours | 424.78 (740.9) [64.28, 126.7, 483.7] N=129    | 307.31 (431.07) [68.03, 108.23, 355.95] N=21 | 447.62 (786.57) [63.18, 136.92, 491.27] N=108 | 0.54    |
| Urine IL-18                       | Pre-op          | 83.95 (310.26) [8.04, 18.84, 48.15] N=125     | 23.95 (22.12) [7.18, 16.4, 48.77] N=20       | 95.38 (337.43) [8.49, 19.84, 47.46] N=105     | 0.37    |
|                                   | Day 1 0-6 Hours | 291.81 (1081.08) [14.78, 43.98, 182.72] N=131 | 118.52 (218.24) [10.45, 58.53, 122.84] N=22  | 326.79 (1179.07) [15.49, 43.42, 200.22] N=109 | 0.66    |
| Urine IL-18 Creatinine Corrected  | Pre-op          | 1.83 (4.67) [0.24, 0.51, 1.24] N=125          | 0.79 (0.64) [0.22, 0.8, 1.22] N=20           | 2.03 (5.06) [0.24, 0.5, 1.24] N=105           | 0.81    |
|                                   | Day 1 0-6 Hours | 17.37 (54.22) [0.9, 2.23, 8.06] N=131         | 5.57 (9.88) [0.86, 3.18, 4.88] N=22          | 19.75 (59.04) [0.91, 1.9, 8.06] N=109         | 0.81    |
| Urine NGAL                        | Pre-op          | 12.14 (37.01) [1.94, 4.15, 7.74] N=125        | 18.7 (66.35) [1.81, 3.61, 4.8] N=20          | 10.89 (28.62) [1.97, 4.34, 8.7] N=105         | 0.26    |
|                                   | Day 1 0-6 Hours | 115.33 (414.81) [2.99, 8.4, 34.38] N=131      | 23.57 (31.57) [2.99, 6.91, 44.71] N=22       | 133.85 (452.62) [3.02, 9.44, 33.67] N=109     | 0.68    |
| Urine NGAL Creatinine Corrected   | Pre-op          | 0.54 (3.21) [0.04, 0.08, 0.25] N=125          | 0.47 (1.48) [0.05, 0.11, 0.21] N=20          | 0.55 (3.45) [0.04, 0.08, 0.25] N=105          | 0.80    |
|                                   | Day 1 0-6 Hours | 6.21 (20.31) [0.14, 0.47, 1.71] N=131         | 1.27 (1.92) [0.24, 0.38, 1.92] N=22          | 7.21 (22.14) [0.14, 0.49, 1.64] N=109         | 0.74    |
| Plasma NGAL                       | Pre-op          | 86.43 (51.82) [60, 61.28, 97.82] N=123        | 88.11 (31.58) [60, 78.38, 105.18] N=21       | 86.09 (55.18) [60, 60, 94.34] N=102           | 0.21    |
|                                   | Day 1 0-6 Hours | 162.48 (111.47) [83.15, 130.32, 183.64] N=121 | 167.97 (116.68) [86.74, 125.43, 181.05] N=21 | 161.33 (110.92) [82.92, 130.51, 185.04] N=100 | 0.93    |
| Urine KIM-1                       | Pre-op          | 0.82 (0.99) [0.22, 0.55, 0.98] N=124          | 0.51 (0.44) [0.07, 0.42, 0.78] N=20          | 0.88 (1.05) [0.23, 0.56, 1.05] N=104          | 0.17    |
|                                   | Day 1 0-6 Hours | 0.59 (0.61) [0.19, 0.4, 0.8] N=130            | 0.48 (0.43) [0.18, 0.35, 0.66] N=21          | 0.61 (0.64) [0.2, 0.4, 0.82] N=109            | 0.36    |
| Urine KIM-1 Creatinine Corrected  | Pre-op          | 0.02 (0.02) [0.01, 0.01, 0.02] N=124          | 0.01 (0.01) [0.01, 0.01, 0.02] N=20          | 0.02 (0.02) [0.01, 0.01, 0.02] N=104          | 0.52    |

| Biomarker                                           |                       | Overall                                            | Hypertension                                     | No Hypertension                                   | P-value |
|-----------------------------------------------------|-----------------------|----------------------------------------------------|--------------------------------------------------|---------------------------------------------------|---------|
|                                                     | Day 1<br>0-6<br>Hours | 0.03 (0.03) [0.01,<br>0.02, 0.03] N=130            | 0.03 (0.02) [0.01,<br>0.02, 0.03] N=21           | 0.03 (0.04) [0.01,<br>0.02, 0.04] N=109           | 0.65    |
| Urine L-FABP                                        | Pre-op                | 8.45 (22.05) [1.36,<br>3.24, 6.77] N=124           | 3.71 (4.14) [1.13,<br>2.33, 5.68] N=20           | 9.36 (23.92) [1.41,<br>3.37, 7.3] N=104           | 0.24    |
|                                                     | Day 1<br>0-6<br>Hours | 227.95 (372.21)<br>[13.46, 58.62,<br>259.51] N=130 | 149.06 (279.68)<br>[8.53, 23.47,<br>144.53] N=21 | 243.15 (386.72)<br>[19.17, 65.96,<br>267.2] N=109 | 0.21    |
| Urine L-FABP<br>Creatinine<br>Corrected             | Pre-op                | 0.28 (0.9) [0.04,<br>0.08, 0.19] N=124             | 0.17 (0.28) [0.04,<br>0.06, 0.15] N=20           | 0.3 (0.98) [0.04,<br>0.09, 0.19] N=104            | 0.69    |
|                                                     | Day 1<br>0-6<br>Hours | 15.09 (37.03)<br>[0.74, 3.01, 13.35]<br>N=130      | 8.25 (16.84) [0.58,<br>1.56, 9.85] N=21          | 16.41 (39.68)<br>[0.75, 3.44, 14.53]<br>N=109     | 0.36    |
| Results are presented mean (SD) [p25, median, 75] N |                       |                                                    |                                                  |                                                   |         |

**eTable 7: Peri-operative biomarker results and 5-year CKD**

| Biomarker                         |                 | Overall                                       | CKD                                         | No CKD                                       | P-value |
|-----------------------------------|-----------------|-----------------------------------------------|---------------------------------------------|----------------------------------------------|---------|
| Urine albumin                     | Pre-op          | 26.15 (45.65) [4.1, 8.4, 24.5] N=105          | 38.97 (64.64) [3.1, 11.7, 50.5] N=19        | 23.31 (40.25) [4.2, 8.3, 20.3] N=86          | 0.11    |
|                                   | Day 1 0-6 Hours | 66.53 (102.75) [10.9, 28.65, 93.2] N=114      | 53.79 (63.38) [8.9, 43, 68.4] N=21          | 69.41 (109.77) [11.7, 25.8, 93.6] N=93       | 0.40    |
| Urine Albumin to Creatinine Ratio | Pre-op          | 75.01 (215.99) [10.96, 22.89, 63.79] N=105    | 96.28 (148.23) [14.6, 27.17, 127.26] N=19   | 70.32 (228.7) [10.95, 22.51, 63.12] N=86     | 0.18    |
|                                   | Day 1 0-6 Hours | 373.67 (573.9) [63.75, 121.59, 452.31] N=114  | 220.68 (220.28) [68.03, 103.5, 374.77] N=21 | 408.22 (622.45) [59.73, 126.7, 483.7] N=93   | 0.54    |
| Urine IL-18                       | Pre-op          | 84.24 (325.19) [7.75, 18.58, 46.02] N=112     | 85.88 (294.71) [7.86, 15.12, 35.47] N=20    | 83.88 (332.95) [7.57, 19.18, 47.81] N=92     | 0.37    |
|                                   | Day 1 0-6 Hours | 304.46 (1144.93) [13.01, 43.17, 164.58] N=116 | 277.55 (637.23) [10.39, 55.95, 182.72] N=21 | 310.41 (1231.72) [13.3, 40.43, 161.55] N=95  | 0.66    |
| Urine IL-18 Creatinine Corrected  | Pre-op          | 1.74 (4.74) [0.2, 0.49, 1.06] N=112           | 2.18 (7.24) [0.13, 0.48, 1.08] N=20         | 1.64 (4.05) [0.25, 0.49, 1.06] N=92          | 0.81    |
|                                   | Day 1 0-6 Hours | 17.17 (56.15) [0.87, 1.78, 8.03] N=116        | 17.57 (50.64) [0.71, 1.4, 9.4] N=21         | 17.09 (57.54) [0.95, 1.81, 7.99] N=95        | 0.81    |
| Urine NGAL                        | Pre-op          | 10.33 (31.98) [1.84, 3.86, 7.11] N=112        | 12.62 (23.31) [2.37, 4.92, 8.08] N=20       | 9.83 (33.65) [1.65, 3.78, 6.97] N=92         | 0.26    |
|                                   | Day 1 0-6 Hours | 115.44 (432.73) [2.95, 8.61, 34.03] N=116     | 167.07 (674.72) [3.96, 7.08, 21.25] N=21    | 104.03 (362.63) [2.58, 9.44, 43.09] N=95     | 0.68    |
| Urine NGAL Creatinine Corrected   | Pre-op          | 0.26 (0.71) [0.04, 0.08, 0.23] N=112          | 0.22 (0.34) [0.05, 0.16, 0.25] N=20         | 0.26 (0.77) [0.04, 0.07, 0.22] N=92          | 0.80    |
|                                   | Day 1 0-6 Hours | 5.79 (19.81) [0.12, 0.47, 1.54] N=116         | 5.98 (22.52) [0.21, 0.52, 0.94] N=21        | 5.75 (19.3) [0.12, 0.46, 1.86] N=95          | 0.74    |
| Plasma NGAL                       | Pre-op          | 86.4 (52.14) [60, 62.44, 97.82] N=110         | 75.51 (21.65) [60, 60, 94.59] N=20          | 88.81 (56.54) [60, 64.92, 100.95] N=90       | 0.21    |
|                                   | Day 1 0-6 Hours | 166.15 (112.73) [86.74, 130.69, 186.44] N=107 | 201.2 (152.1) [83.34, 147.52, 283.57] N=19  | 158.59 (101.84) [86.92, 130.51, 180.33] N=88 | 0.93    |
| Urine KIM-1                       | Pre-op          | 0.81 (1.02) [0.17, 0.51, 0.86] N=111          | 0.8 (1.09) [0.16, 0.48, 0.7] N=19           | 0.81 (1.02) [0.2, 0.53, 0.89] N=92           | 0.17    |
|                                   | Day 1 0-6 Hours | 0.56 (0.58) [0.19, 0.38, 0.79] N=115          | 0.69 (0.51) [0.27, 0.71, 0.92] N=21         | 0.54 (0.59) [0.18, 0.36, 0.72] N=94          | 0.36    |
| Urine KIM-1 Creatinine Corrected  | Pre-op          | 0.02 (0.01) [0.01, 0.01, 0.02] N=111          | 0.01 (0.01) [0.01, 0.01, 0.02] N=19         | 0.02 (0.01) [0.01, 0.01, 0.02] N=92          | 0.52    |

| Biomarker                                           |                       | Overall                                           | CKD                                                | No CKD                                           | P-value |
|-----------------------------------------------------|-----------------------|---------------------------------------------------|----------------------------------------------------|--------------------------------------------------|---------|
|                                                     | Day 1<br>0-6<br>Hours | 0.03 (0.02) [0.01,<br>0.02, 0.03] N=115           | 0.03 (0.03) [0.01,<br>0.02, 0.04] N=21             | 0.03 (0.02) [0.01,<br>0.02, 0.03] N=94           | 0.65    |
| Urine L-FABP                                        | Pre-op                | 7.56 (20.73) [1.34,<br>2.65, 6.48] N=111          | 4.87 (5.22) [1.12,<br>3.27, 8.86] N=19             | 8.12 (22.63) [1.41,<br>2.57, 6.3] N=92           | 0.24    |
|                                                     | Day 1<br>0-6<br>Hours | 219.58 (358.96)<br>[8.63, 56.02,<br>261.06] N=115 | 258.84 (373.62)<br>[21.22, 142.71,<br>342.72] N=21 | 210.81 (357.08)<br>[8.53, 52.76,<br>259.51] N=94 | 0.21    |
| Urine L-FABP<br>Creatinine<br>Corrected             | Pre-op                | 0.23 (0.86) [0.04,<br>0.08, 0.18] N=111           | 0.11 (0.09) [0.04,<br>0.08, 0.15] N=19             | 0.26 (0.94) [0.03,<br>0.08, 0.19] N=92           | 0.69    |
|                                                     | Day 1<br>0-6<br>Hours | 14.01 (35.72) [0.68,<br>2.92, 13.58] N=115        | 14.34 (21.45) [0.8,<br>4.43, 20.1] N=21            | 13.94 (38.28)<br>[0.58, 2.46, 13.35]<br>N=94     | 0.36    |
| Results are presented mean (SD) [p25, median, 75] N |                       |                                                   |                                                    |                                                  |         |

**eTable 8: Association of kidney injury and 5-year renal outcomes**

| AKI definition | Outcome              | Overall                                             | No Injury†<br>(no elevated biomarker)           | Kidney Injury<br>(elevated biomarker)              | P-value |
|----------------|----------------------|-----------------------------------------------------|-------------------------------------------------|----------------------------------------------------|---------|
| Urine IL-18    | Microalbuminuria No  | 107 (92%)                                           | 91 (92%)                                        | 16 (94%)                                           | 0.75    |
|                | Microalbuminuria Yes | 9 (8%)                                              | 8 (8%)                                          | 1 (6%)                                             |         |
|                | eGFR                 | 113.74 (24.88)<br>[101.22, 111.66, 125.53]<br>N=101 | 114.33 (24.11)<br>[100.72, 111.58, 125.36] N=88 | 109.73 (30.43)<br>[101.75, 115.12, 125.95]<br>N=13 | 0.54    |
|                | CKD No               | 95 (82%)                                            | 82 (83%)                                        | 13 (76%)                                           | 0.53    |
|                | CKD Yes              | 21 (18%)                                            | 17 (17%)                                        | 4 (24%)                                            |         |
|                | Hypertension No      | 109 (83%)                                           | 90 (81%)                                        | 19 (95%)                                           | 0.13    |
|                | Hypertension Yes     | 22 (17%)                                            | 21 (19%)                                        | 1 (5%)                                             |         |
| Urine NGAL     | Microalbuminuria No  | 107 (92%)                                           | 92 (92%)                                        | 15 (94%)                                           | 0.81    |
|                | Microalbuminuria Yes | 9 (8%)                                              | 8 (8%)                                          | 1 (6%)                                             |         |
|                | eGFR                 | 113.74 (24.88)<br>[101.22, 111.66, 125.53]<br>N=101 | 113.27 (24.1)<br>[99.96, 111.51, 125.28] N=87   | 116.65 (30.16)<br>[101.93, 112.48, 142.78]<br>N=14 | 0.41    |
|                | CKD No               | 95 (82%)                                            | 82 (82%)                                        | 13 (81%)                                           | 0.94    |
|                | CKD Yes              | 21 (18%)                                            | 18 (18%)                                        | 3 (19%)                                            |         |
|                | Hypertension No      | 109 (83%)                                           | 92 (82%)                                        | 17 (89%)                                           | 0.43    |
|                | Hypertension Yes     | 22 (17%)                                            | 20 (18%)                                        | 2 (11%)                                            |         |
| Plasma NGAL    | Microalbuminuria No  | 100 (93%)                                           | 86 (95%)                                        | 14 (88%)                                           | 0.30    |
|                | Microalbuminuria Yes | 7 (7%)                                              | 5 (5%)                                          | 2 (13%)                                            |         |
|                | eGFR                 | 112.59 (24.95)<br>[99.02, 111.44, 125.36] N=92      | 113.85 (24.54)<br>[100.22, 111.36, 125.44] N=79 | 104.96 (27.1)<br>[93.39, 111.66, 125.28] N=13      | 0.54    |
|                | CKD No               | 88 (82%)                                            | 77 (85%)                                        | 11 (69%)                                           | 0.13    |
|                | CKD Yes              | 19 (18%)                                            | 14 (15%)                                        | 5 (31%)                                            |         |
|                | Hypertension No      | 100 (83%)                                           | 86 (83%)                                        | 14 (78%)                                           | 0.55    |
|                | Hypertension Yes     | 21 (17%)                                            | 17 (17%)                                        | 4 (22%)                                            |         |
| Urine KIM-1    | Microalbuminuria No  | 106 (92%)                                           | 95 (93%)                                        | 11 (85%)                                           | 0.28    |
|                | Microalbuminuria Yes | 9 (8%)                                              | 7 (7%)                                          | 2 (15%)                                            |         |
|                | eGFR                 | 113.74 (24.88)<br>[101.22,                          | 113.84 (25.88)                                  | 112.91 (15.16)<br>[101.75,                         | 0.99    |

| AKI definition                                                                                                                                                                                                                                                                                                                                                       | Outcome              | Overall                                       | No Injury†<br>(no elevated biomarker)        | Kidney Injury<br>(elevated biomarker)        | P-value |
|----------------------------------------------------------------------------------------------------------------------------------------------------------------------------------------------------------------------------------------------------------------------------------------------------------------------------------------------------------------------|----------------------|-----------------------------------------------|----------------------------------------------|----------------------------------------------|---------|
|                                                                                                                                                                                                                                                                                                                                                                      |                      | 111.66, 125.53]<br>N=101                      | [100.22, 111.58, 125.53] N=90                | 113.31, 125.95]<br>N=11                      |         |
|                                                                                                                                                                                                                                                                                                                                                                      | CKD No               | 94 (82%)                                      | 84 (82%)                                     | 10 (77%)                                     | 0.63    |
|                                                                                                                                                                                                                                                                                                                                                                      | CKD Yes              | 21 (18%)                                      | 18 (18%)                                     | 3 (23%)                                      |         |
|                                                                                                                                                                                                                                                                                                                                                                      | Hypertension No      | 109 (84%)                                     | 96 (83%)                                     | 13 (87%)                                     | 0.75    |
|                                                                                                                                                                                                                                                                                                                                                                      | Hypertension Yes     | 21 (16%)                                      | 19 (17%)                                     | 2 (13%)                                      |         |
| Urine L-FABP                                                                                                                                                                                                                                                                                                                                                         | Microalbuminuria No  | 106 (92%)                                     | 72 (94%)                                     | 34 (89%)                                     | 0.45    |
|                                                                                                                                                                                                                                                                                                                                                                      | Microalbuminuria Yes | 9 (8%)                                        | 5 (6%)                                       | 4 (11%)                                      |         |
|                                                                                                                                                                                                                                                                                                                                                                      | eGFR                 | 113.74 (24.88) [101.22, 111.66, 125.53] N=101 | 113.19 (20.52) [101.56, 112.64, 125.61] N=68 | 114.86 (32.42) [100.22, 108.29, 125.53] N=33 | 0.77    |
|                                                                                                                                                                                                                                                                                                                                                                      | CKD No               | 94 (82%)                                      | 64 (83%)                                     | 30 (79%)                                     | 0.59    |
|                                                                                                                                                                                                                                                                                                                                                                      | CKD Yes              | 21 (18%)                                      | 13 (17%)                                     | 8 (21%)                                      |         |
|                                                                                                                                                                                                                                                                                                                                                                      | Hypertension No      | 109 (84%)                                     | 71 (82%)                                     | 38 (88%)                                     | 0.32    |
|                                                                                                                                                                                                                                                                                                                                                                      | Hypertension Yes     | 21 (16%)                                      | 16 (18%)                                     | 5 (12%)                                      |         |
| †Kidney injury defined as elevated biomarkers measured on day 1 0-6 hours. Elevated biomarkers defined as values higher than the 5 <sup>th</sup> quintile in the TRIBE in-hospital cohort; Urine IL-18>362 pg/mL, Urine NGAL>70 ng/mL, Plasma NGAL>259 ng/mL, Urine KIM-1>0.99 ng/mL, Urine L-FABP>399 ng/mL. Results are presented as mean (SD) [p25, median, p75]. |                      |                                               |                                              |                                              |         |
